# Supplementary material for: Antimicrobial sesquiterpenes from the cultured mycobiont Diorygma pruinosum against methicillin-resistant Staphylococcus aureus isolated from Vietnamese street foods
Source: Royal Society of Chemistry journal article supplement (doi:10.1039/d3ra07112j), 2024-01-01
Supplement: d3ra07112j1.pdf [file d3ra07112j1.pdf]

## SUPPORTING INFORMATION

### **Antimicrobial Sesquiterpenes from the Cultured Mycobiont *Diorygma pruinosum* against Methicillin-Resistant *Staphylococcus aureus* Isolated from Vietnamese Street Foods**

#### **TABLE OF CONTENTS**

**Table S1.**  $^1\text{H}$  (500 MHz) and  $^{13}\text{C}$  (125 MHz) NMR data of **2** and hydroxypruinose (acetone- $d_6$ ,  $\delta$ , ppm)

**Table S2.**  $^1\text{H}$  (500 MHz) and  $^{13}\text{C}$  (125 MHz) NMR data of **3** and pruinose (acetone- $d_6$ ,  $\delta$ , ppm)

**Figure S1.** *S. aureus* on mannitol salt agar (A) and Baird-Parker agar with tellurite egg yolk (B)

**Figure S2.** Gram stain of *S. aureus*

**Figure S3.** Catalase test result A: negative control B: a presumptive *S. aureus* isolate (catalase positive)

**Figure S4.** Indole test result A: negative control B: a presumptive *S. aureus* isolate (Indole negative)

**Figure S5.** Methyl red test result A: negative control B: a presumptive *S. aureus* isolate (methyl red positive)

**Figure S6.** Voges Proskauer test result A: negative control B: a presumptive *S. aureus* isolate (Voges Proskauer positive)

**Figure S7.** Oxidase test result A: negative control B: a presumptive *S. aureus* isolate (oxidase negative)

**Figure S8.** Carbohydrate fermentation test result A: negative control B: a presumptive *S. aureus* isolate (Carbohydrate fermentation positive)

**Figure S9.** Coagulase test result A: negative control B: a presumptive *S. aureus* isolate (Coagulase positive)

**Figure S10.** Gel electrophoresis of PCR product for detection of *mecA* gene Lane M shows DNA ladder, MW 200 – 200 bp fragments (HTBiotech, Vietnam). Lane 1 shows a typical band size 5090 bp of *mecA* gene corresponding to positive isolates

**Figure S11.**  $^1\text{H}$  NMR (acetone- $d_6$ , 500 MHz) spectrum of **1**

**Figure S12.**  $^1\text{H}$  NMR (acetone- $d_6$ , 500 MHz) spectrum of **2**  
**Figure S13.**  $^{13}\text{C}$  NMR (acetone- $d_6$ , 125 MHz) spectrum of **2**  
**Figure S14.** HSQC (acetone- $d_6$ , 500 MHz, 125 MHz) spectrum of **2**  
**Figure S15.** HMBC (acetone- $d_6$ , 500 MHz, 125 MHz) spectrum of **2**  
**Figure S16.** COSY (acetone- $d_6$ , 500 MHz) spectrum of **2**  
**Figure S17.** NOESY (acetone- $d_6$ , 500 MHz) spectrum of **2**  
**Figure S18.** HRESIMS spectrum of **2**  
**Figure S19.** HRESIMS spectrum of **3**  
**Figure S20.**  $^1\text{H}$  NMR (acetone- $d_6$ , 500 MHz) spectrum of **3**  
**Figure S21.**  $^{13}\text{C}$  NMR (acetone- $d_6$ , 125 MHz) spectrum of **3**  
**Figure S22.**  $^1\text{H}$ - $^1\text{H}$  COSY (acetone- $d_6$ , 500 MHz) spectrum of **3**  
**Figure S23.** HSQC (acetone- $d_6$ , 500 MHz, 125 MHz) spectrum of **3**  
**Figure S24.** HMBC (acetone- $d_6$ , 500 MHz, 125 MHz) spectrum of **3**  
**Figure S25.** NOESY (acetone- $d_6$ , 500 MHz) spectrum of **3**  
**Figure S26.** HRESIMS spectrum of **4**  
**Figure S27.**  $^1\text{H}$  NMR (acetone- $d_6$ , 500 MHz) spectrum of **4**  
**Figure S28.**  $^{13}\text{C}$  NMR (acetone- $d_6$ , 125 MHz) spectrum of **4**  
**Figure S29.** HSQC (acetone- $d_6$ , 500 MHz, 125 MHz) spectrum of **4**  
**Figure S30.** HMBC (acetone- $d_6$ , 500 MHz, 125 MHz) spectrum of **4**  
**Figure S31.** NOESY (acetone- $d_6$ , 500 MHz) spectrum of **4**  
**Figure S32.** Chromatogram of **2**  
**Figure S33.** Chromatogram of **3**  
**Figure S34.** Chromatogram of **4**  
**Figure S35.**  $^1\text{H}$  NMR (acetone- $d_6$ , 500 MHz) spectrum of **5**  
**Figure S36.**  $^1\text{H}$  NMR ( $\text{CDCl}_3$ , 500 MHz) spectrum of **6**  
**Figure S37.**  $^1\text{H}$  NMR ( $\text{DMSO-}d_6$ , 500 MHz) spectrum of **7**  
**Figure S38.**  $^1\text{H}$  NMR ( $\text{DMSO-}d_6$ , 500 MHz) spectrum of **8**

**Table S1.**  $^1\text{H}$  (500 MHz) and  $^{13}\text{C}$  (125 MHz) NMR data of **2**, **4**, and hydroxypruinose (acetone- $d_6$ ,  $\delta$ , ppm, J/Hz).

|           | <b>2</b>                                                                          |                     | <b>4</b>                                                                          |                     | <b>Hydroxypruinose</b>                                                              |                     |
|-----------|-----------------------------------------------------------------------------------|---------------------|-----------------------------------------------------------------------------------|---------------------|-------------------------------------------------------------------------------------|---------------------|
| <b>No</b> | 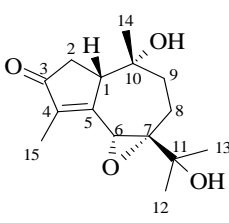 |                     |  |                     |  |                     |
|           | $\delta_{\text{H}}$                                                               | $\delta_{\text{C}}$ | $\delta_{\text{H}}$                                                               | $\delta_{\text{C}}$ | $\delta_{\text{H}}$                                                                 | $\delta_{\text{C}}$ |
| 1         | 3.04 (d, 9.0)                                                                     | 50.3                | 3.93 (m)                                                                          | 37.0                | 3.38 (d, 6.5)                                                                       | 50.5                |
| 2         | 2.51 (m)                                                                          | 45.3                | 2.46 (m)                                                                          | 39.3                | 2.26 (m)                                                                            | 43.4                |
|           | 2.29 (m)                                                                          |                     | 2.08 (m)                                                                          |                     | 2.46 (d, 10.0)                                                                      |                     |
| 3         |                                                                                   | 206.4               |                                                                                   | 208.3               | -                                                                                   | 208.7               |
| 4         |                                                                                   | 141.3               |                                                                                   | 135.7               | -                                                                                   | 139.1               |
| 5         |                                                                                   | 165.7               |                                                                                   | 169.3               | -                                                                                   | 168.2               |
| 6         | 4.20 (s)                                                                          | 57.0                | 4.95 (d, 8.5)                                                                     | 68.9                | 5.02 (s)                                                                            | 66.6                |
| 7         |                                                                                   | 70.7                |                                                                                   | 151.6               | -                                                                                   | 64.9                |
| 8         | 1.65 (m)                                                                          | 23.8                | 5.79 (d, 7.5)                                                                     | 128.4               | 3.14 (t, 6.5)                                                                       | 57.3                |
|           | 1.60 (m)                                                                          |                     |                                                                                   |                     |                                                                                     |                     |
| 9         | 2.26 (m)                                                                          | 38.6                | 4.17 (dd, 12.5, 6.0)                                                              | 70.8                | 2.26 (m)                                                                            | 37.7                |
|           | 2.22 (m)                                                                          |                     |                                                                                   |                     | 2.32 (dd, 7.5, 12.0)                                                                |                     |
| 10        |                                                                                   | 72.1                | 2.40 (dd, 13.5, 6.0)                                                              | 37.3                | -                                                                                   | 73.8                |
| 11        |                                                                                   | 70.5                | 2.32 (hept, 7.0)                                                                  | 41.3                | 1.88 (hep, 6.5)                                                                     | 30.7                |
| 12        | 1.30 (s)                                                                          | 26.1                | 1.09 (d, 7.0)                                                                     | 21.5                | 0.80 (d, 6.5)                                                                       | 17.3                |
| 13        | 1.23 (s)                                                                          | 26.0                | 1.08 (d, 6.5)                                                                     | 22.3                | 1.04 (d, 7.0)                                                                       | 17.7                |
| 14        | 0.78 (s)                                                                          | 19.2                | 0.56 (d, 7.0)                                                                     | 10.5                | 0.94 (s)                                                                            | 19.9                |
| 15        | 1.76 (d, 1.5)                                                                     | 8.0                 | 1.67 (d, 1.5)                                                                     | 8.2                 | 1.76 (d, 1.5)                                                                       | 9.1                 |
| 6-OH      |                                                                                   |                     | 5.38, (d, 8.5)                                                                    |                     | 3.63 (brs)                                                                          |                     |
| 9-OH      |                                                                                   |                     | 5.19, (d, 5.5)                                                                    |                     |                                                                                     |                     |
| 10-OH     |                                                                                   |                     |                                                                                   |                     | 4.06 (brs)                                                                          |                     |

**Table S2.**  $^1\text{H}$  (500 MHz) and  $^{13}\text{C}$  (125 MHz) NMR data of **3** and pruinose (acetone- $d_6$ ,  $\delta$ , ppm, J/Hz).

| No   | <b>3</b>                   |                     | <b>Pruinose</b>     |                     |
|------|----------------------------|---------------------|---------------------|---------------------|
|      | $\delta_{\text{H}}$        | $\delta_{\text{C}}$ | $\delta_{\text{H}}$ | $\delta_{\text{C}}$ |
| 1    | 3.05 (m)                   | 43.9                | 3.28 (m)            | 43.8                |
| 2    | 2.42 (dd, 18.5, 7.0)       | 40.8                | 2.08 (m)            |                     |
|      | 2.03 (m)                   |                     | 2.32 (m)            | 38.1                |
| 3    |                            | 206.4               |                     | 208.1               |
| 4    |                            | 138.7               |                     | 137.6               |
| 5    |                            | 165.6               |                     | 170.8               |
| 6    | 3.76 (s)                   | 54.4                | 5.04 (d, 4.0)       | 66.8                |
| 7    |                            | 73.2                |                     | 66.4                |
| 8    | 4.23 (ddd, 11.5, 7.0, 3.5) | 66.4                | 3.13 (t, 6.0)       | 61.4                |
| 9    | 2.03 (m)                   | 40.4                | 2.08 (m)            | 32.7                |
|      | 1.88 (m)                   |                     | 1.90 (m)            |                     |
| 10   | 2.08 (m)                   | 32.5                | 2.32 (m)            | 33.2                |
| 11   | 2.80 (m)                   | 29.1                | 1.87 (hep, 6.5)     | 30.7                |
| 12   | 0.86 (d, 7.0)              | 16.2                | 0.89 (d, 7.0)       | 17.5                |
| 13   | 1.10 (d, 7.0)              | 20.0                | 1.04 (d, 7.0)       | 17.7                |
| 14   | 0.57 (d, 7.0)              | 11.3                | 0.81 (d, 7.5)       | 14.6                |
| 15   | 1.78 (d, 1.5)              | 7.7                 | 1.74 (d, 1.5)       | 8.8                 |
| 6-OH |                            |                     | 3.53 (d, 4.0)       |                     |

A.

B.

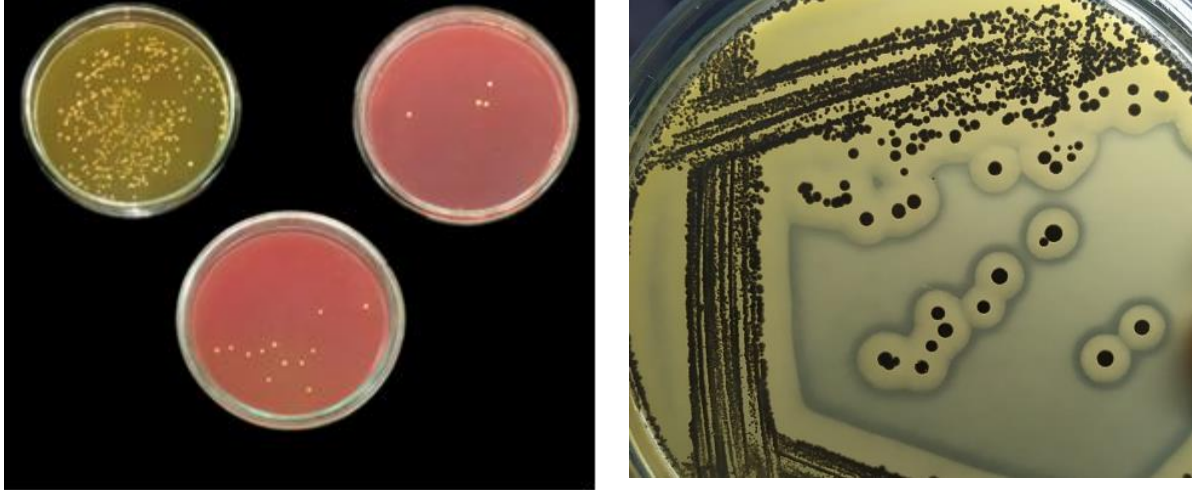

**Figure S1.** *S. aureus* on mannitol salt agar (A) and Baird-Parker agar with tellurite egg yolk (B)

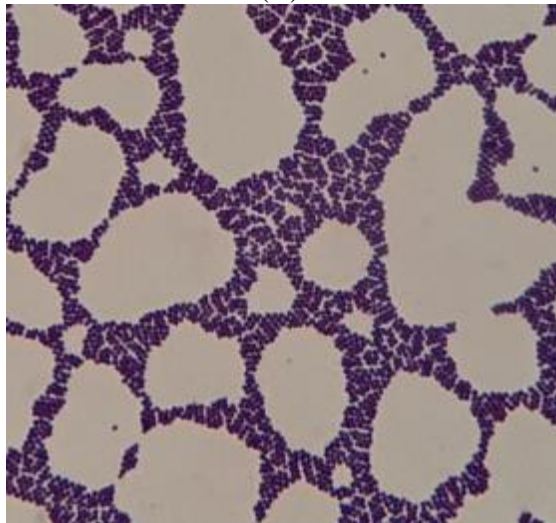

**Figure S2.** Gram stain of *S. aureus*

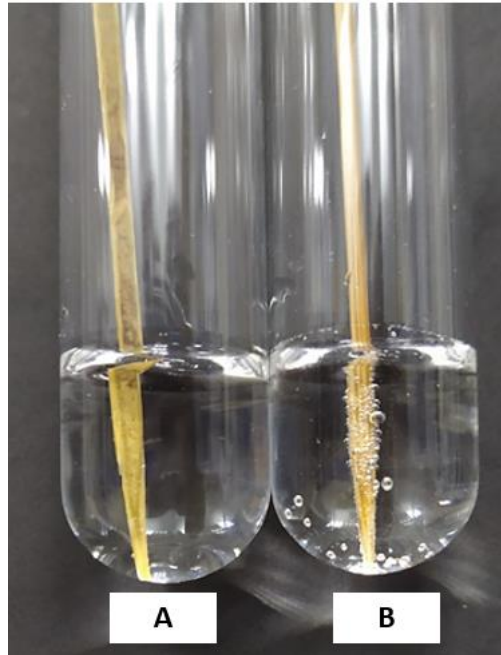

**Figure S3.** Catalase test result

A: negative control B: a presumptive *S. aureus* isolate (catalase positive)

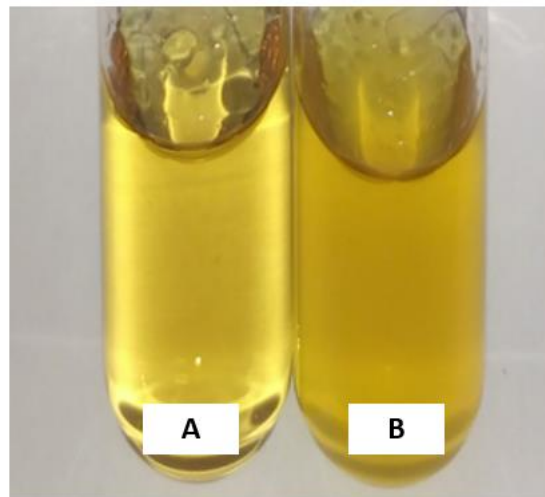

**Figure S4.** Indole test result

A: negative control B: a presumptive *S. aureus* isolate (Indole negative)

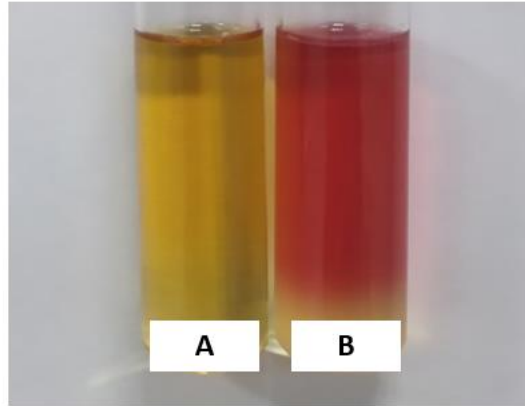

**Figure S5. Methyl red test result**  
A: negative control B: a presumptive *S. aureus* isolate (methyl red positive)

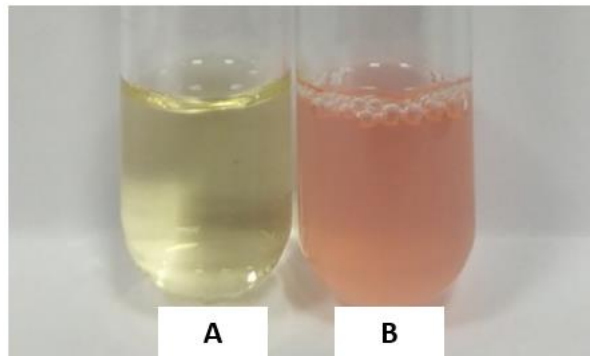

**Figure S6. Voges Proskauer test result**  
A: negative control B: a presumptive *S. aureus* isolate (Voges Proskauer positive)

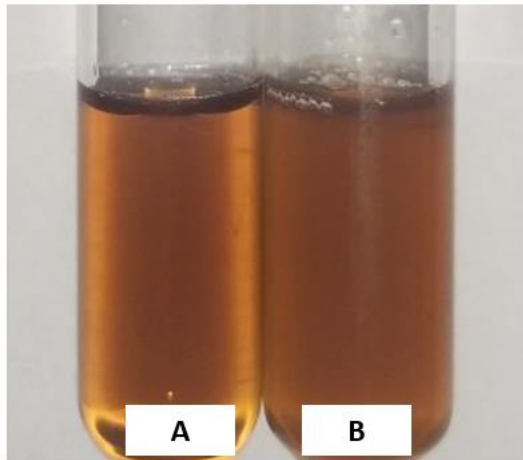

**Figure S7. Oxidase test result**  
A: negative control B: a presumptive *S. aureus* isolate (oxidase negative)

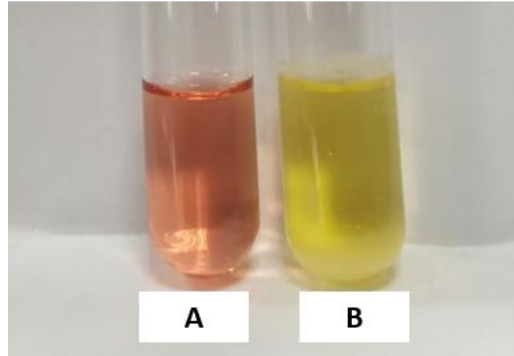

**Figure S8.** Carbohydrate fermentation test result

A: negative control B: a presumptive *S. aureus* isolate (Carbohydrate fermentation positive)

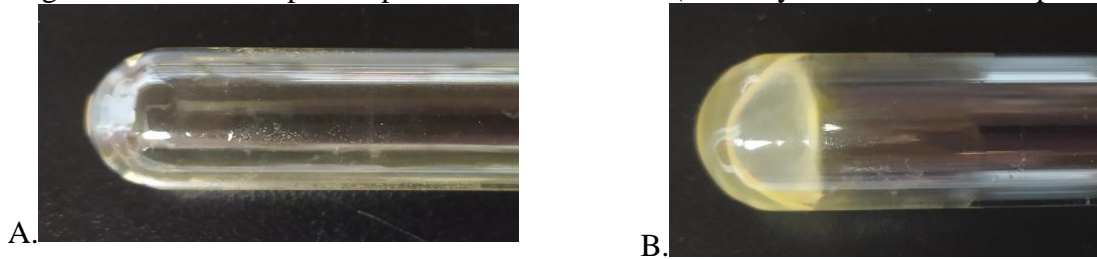

**Figure S9.** Coagulase test result

A: negative control B: a presumptive *S. aureus* isolate (Coagulase positive)

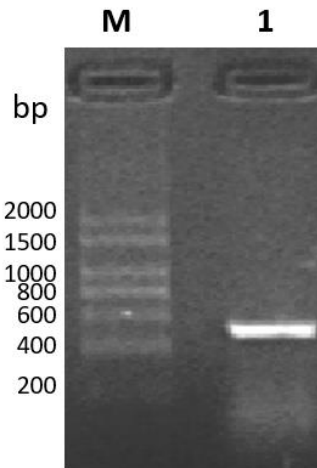

**Figure S10.** Gel electrophoresis of PCR product for detection of *mecA* gene  
Lane M shows DNA ladder, MW 200 – 2000 bp fragments (HTBiotech, Vietnam). Lane 1 shows a typical band size 5090 bp of *mecA* gene corresponding to positive isolates



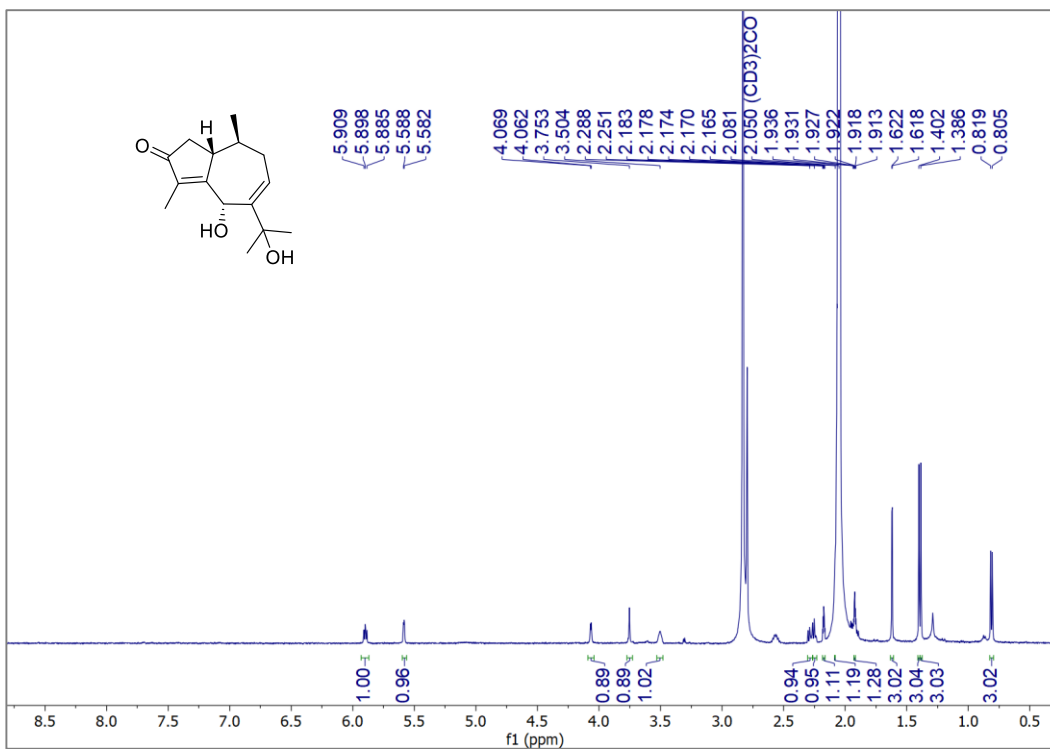

**Figure S11.**  $^1\text{H}$  NMR (acetone- $d_6$ , 500 MHz) spectrum of **1**

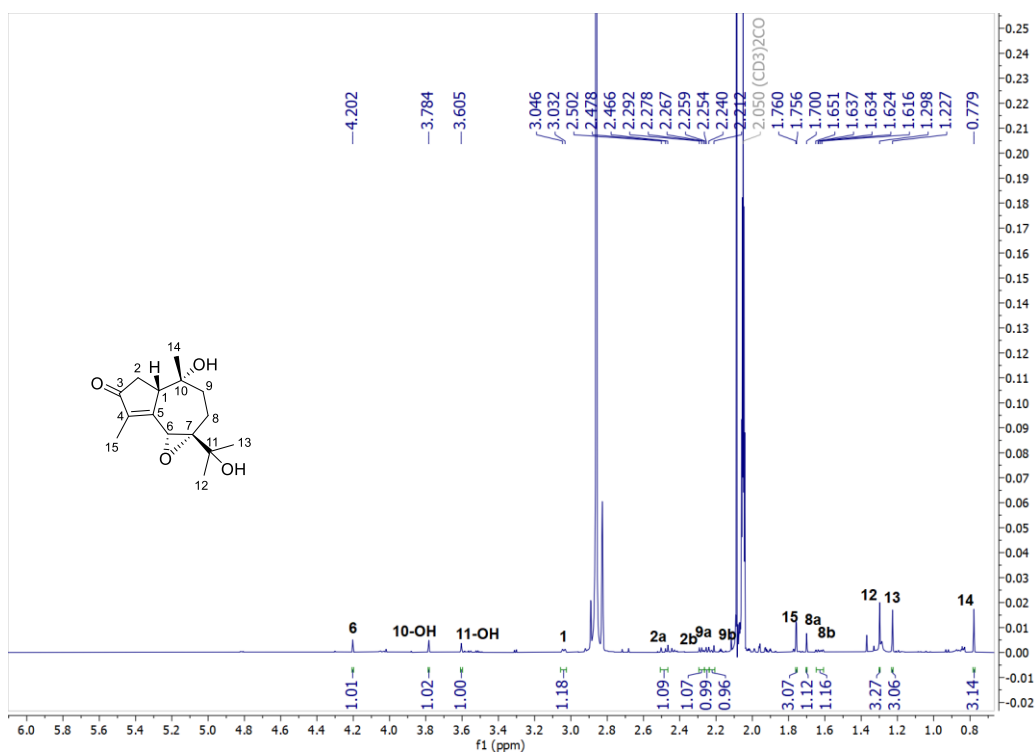

**Figure S12.**  $^1\text{H}$  NMR (acetone- $d_6$ , 500 MHz) spectrum of **2**

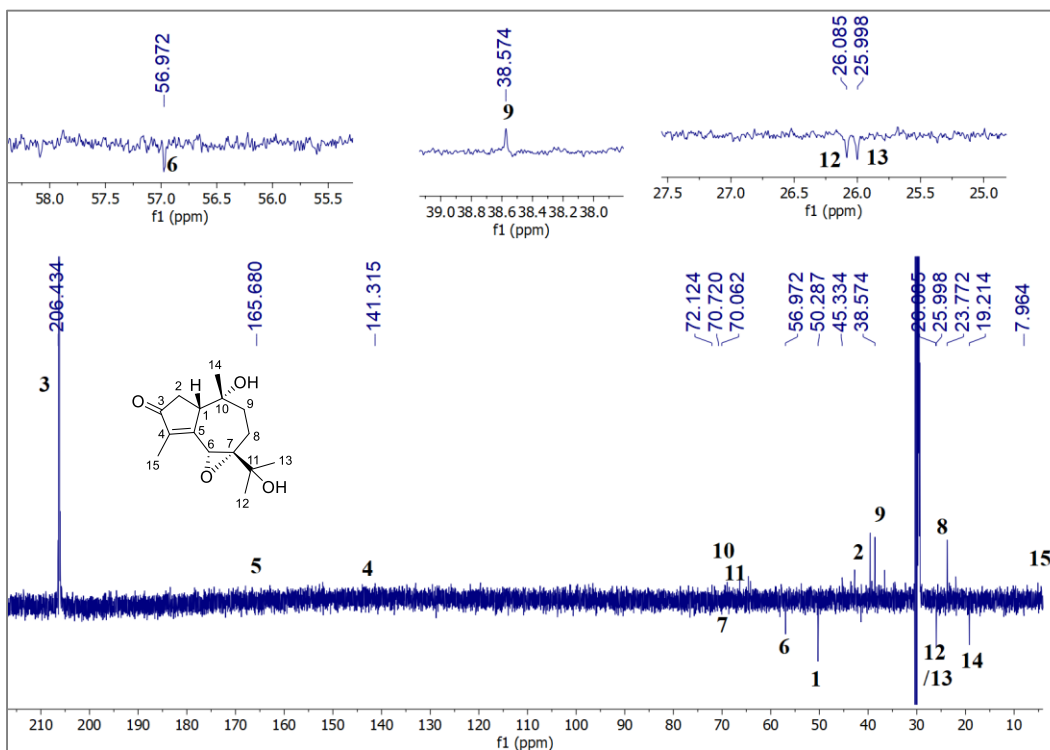

Figure S13.  $^{13}\text{C}$  NMR (acetone- $d_6$ , 125 MHz) spectrum of **2**

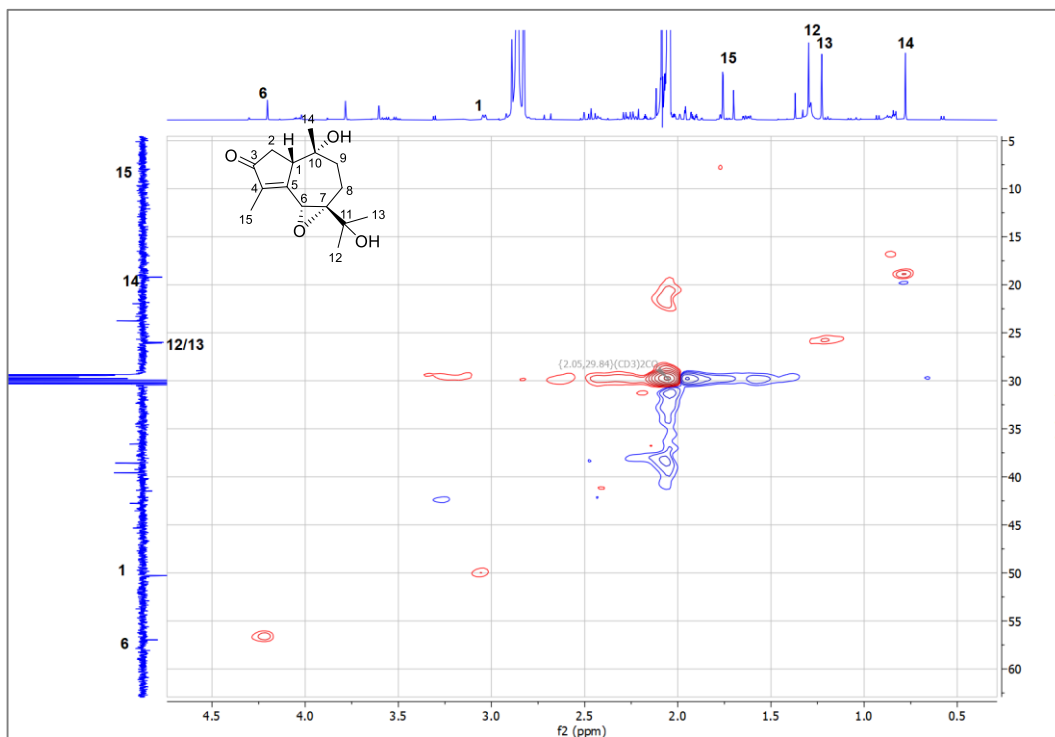

Figure S14. HSQC (acetone- $d_6$ , 500 MHz, 125 MHz) spectrum of **2**

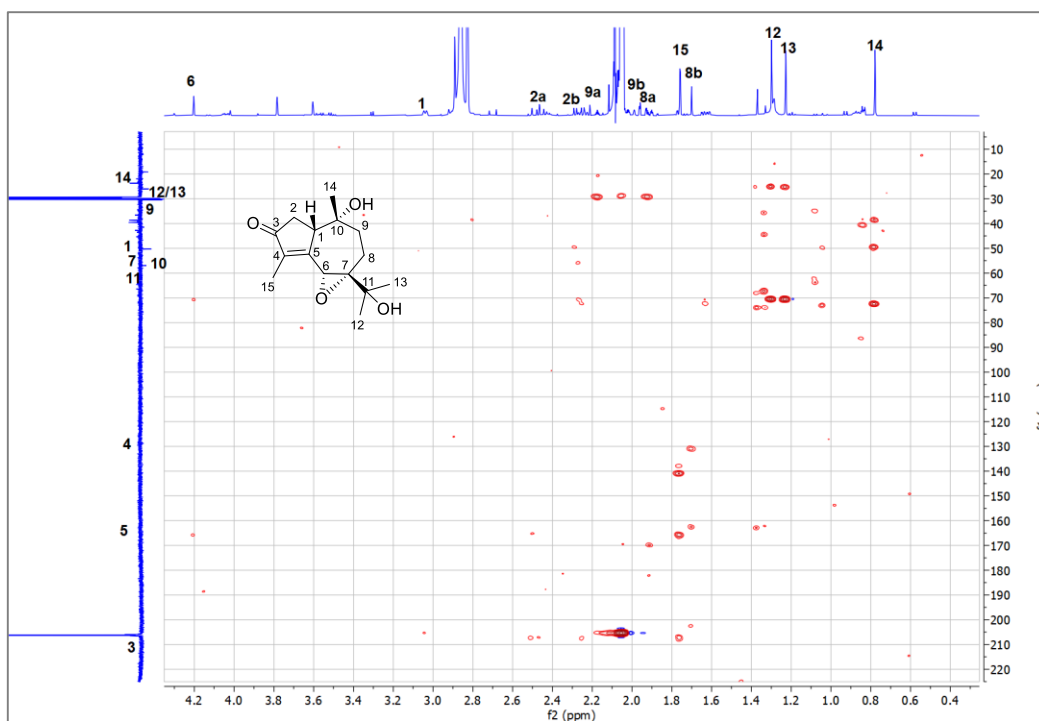

**Figure S15.** HMBC (acetone-*d*<sub>6</sub>, 500 MHz, 125 MHz) spectrum of **2**

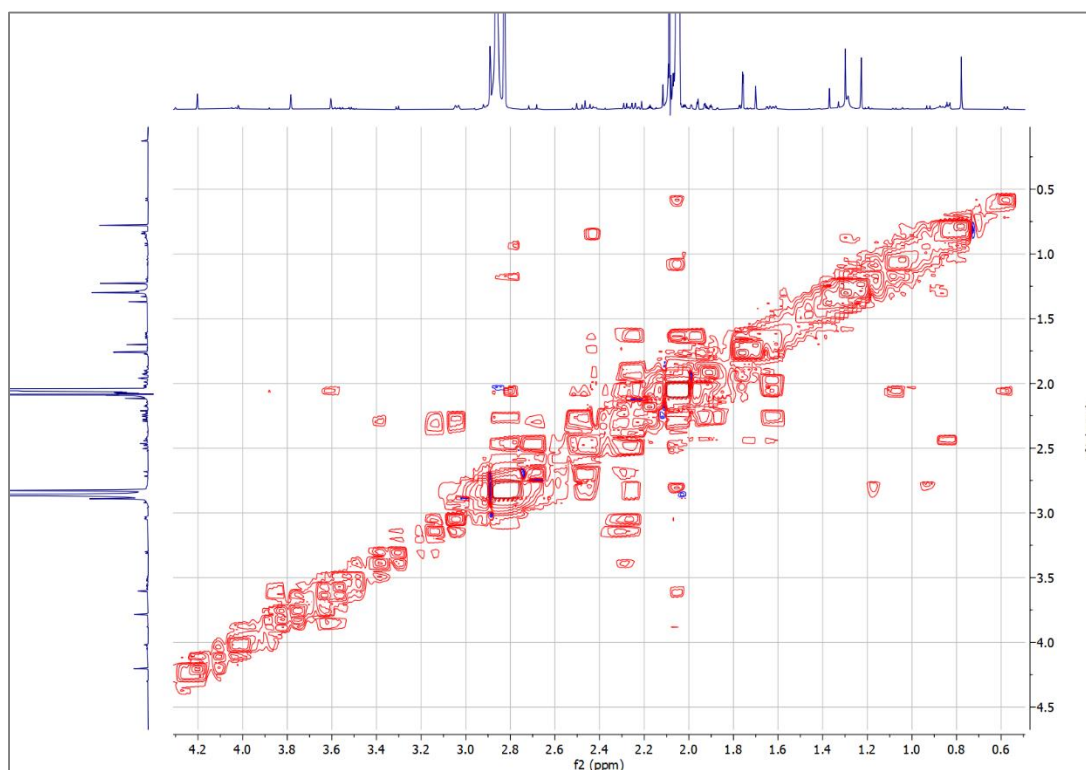

**Figure S16.** COSY (acetone-*d*<sub>6</sub>, 500 MHz) spectrum of **2**

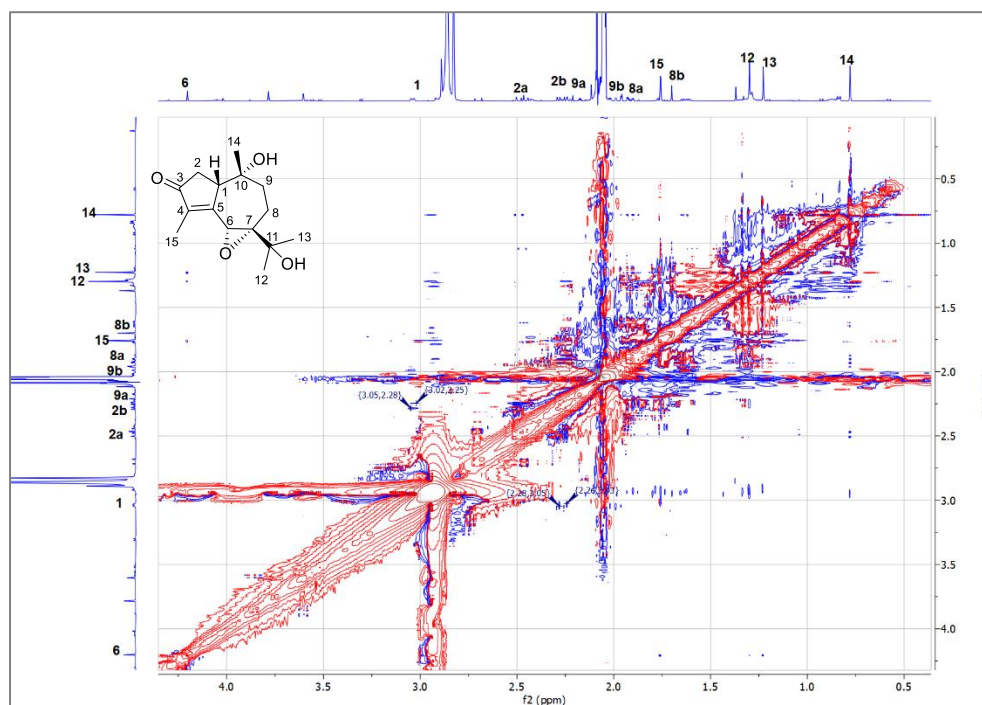

**Figure S17.** NOESY (acetone- $d_6$ , 500 MHz, 125 MHz) spectrum of **2**

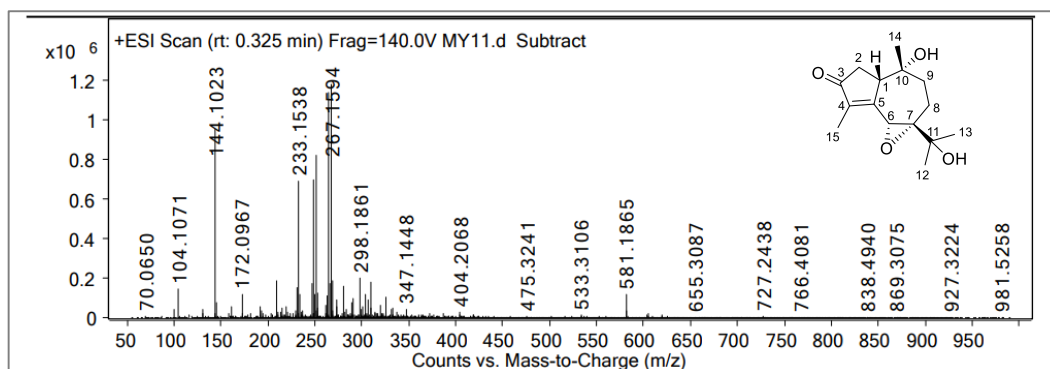

**Figure S18.** HRESIMS spectrum of **2**

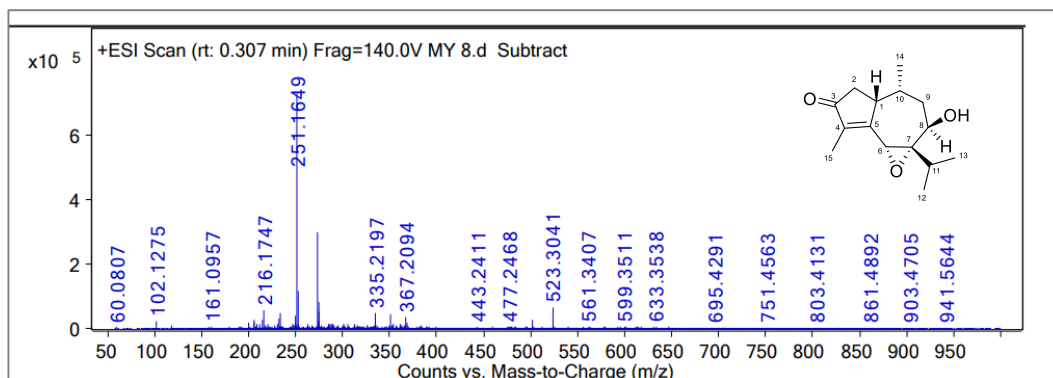

**Figure S19.** HRESIMS spectrum of **3**

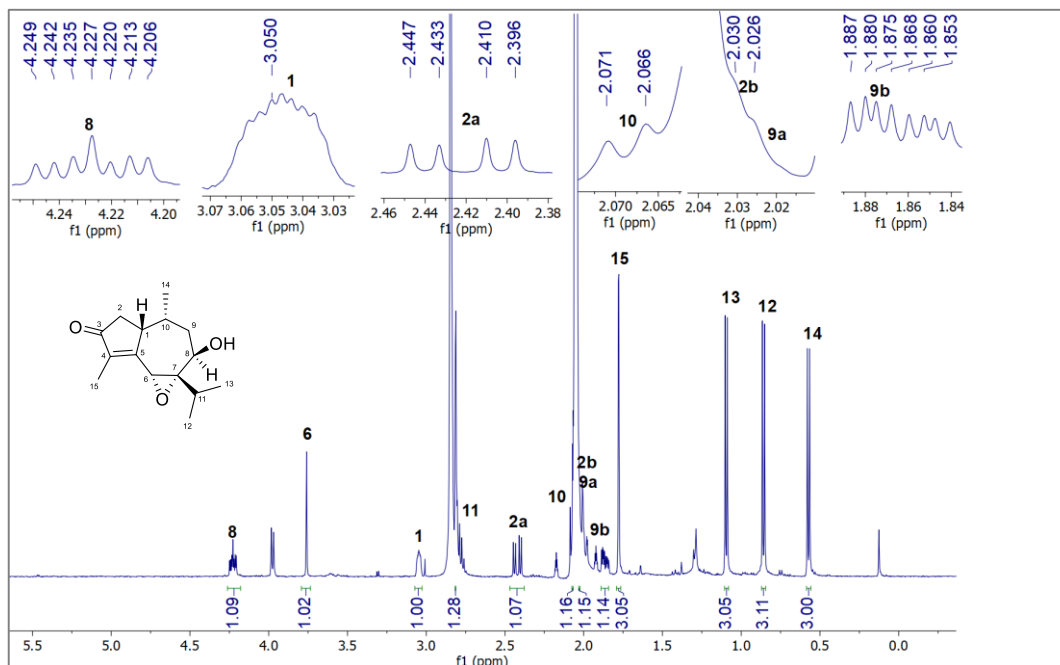

Figure S20.  $^1\text{H}$  NMR (acetone- $d_6$ , 500 MHz) spectrum of **3**

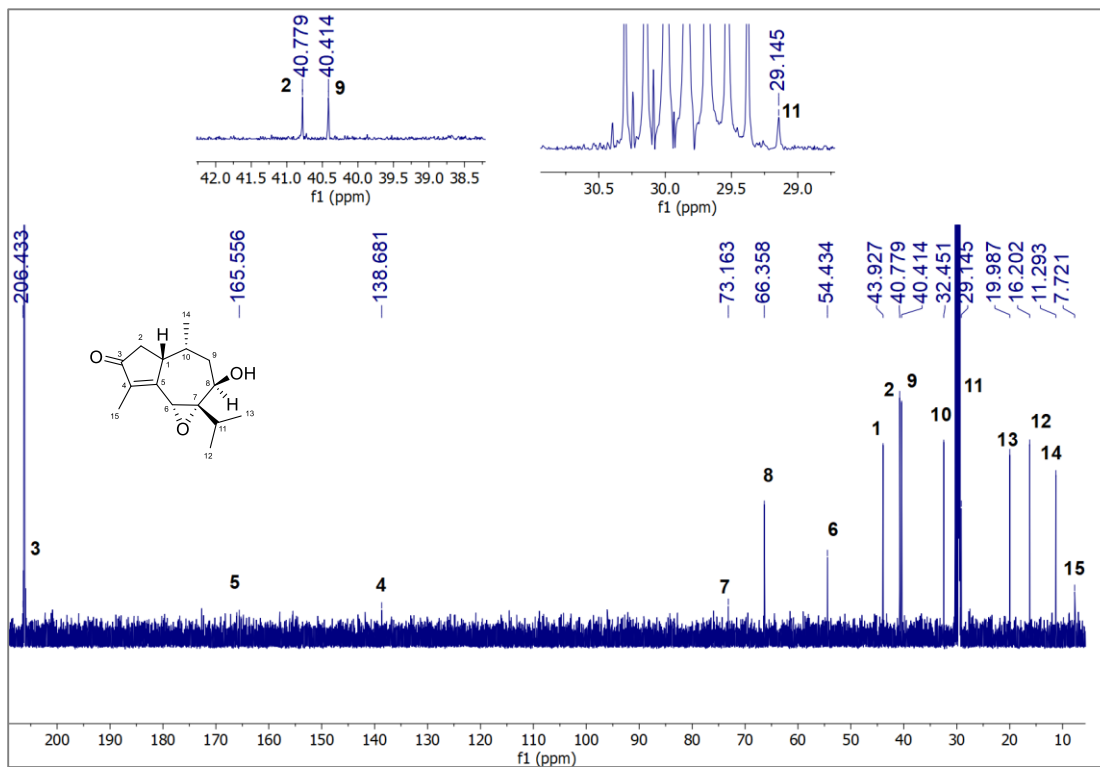

Figure S21.  $^{13}\text{C}$  NMR (acetone- $d_6$ , 125 MHz) spectrum of **3**

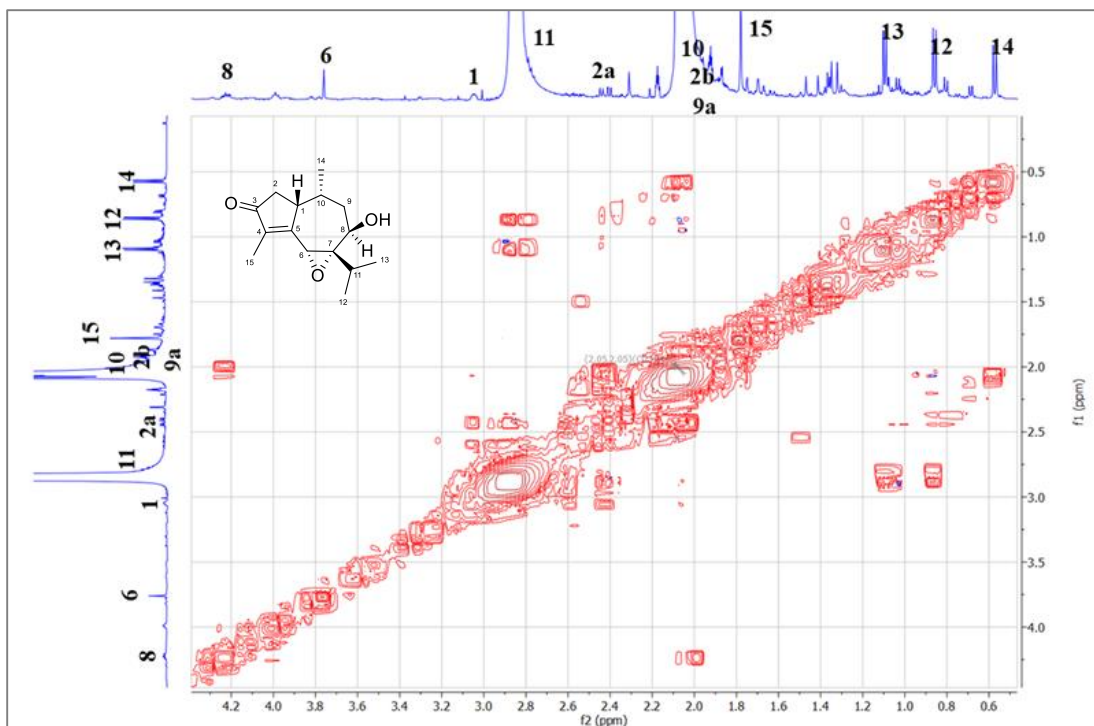

Figure S22.  $^1\text{H}$ - $^1\text{H}$  COSY (acetone- $d_6$ , 500 MHz) spectrum of **3**

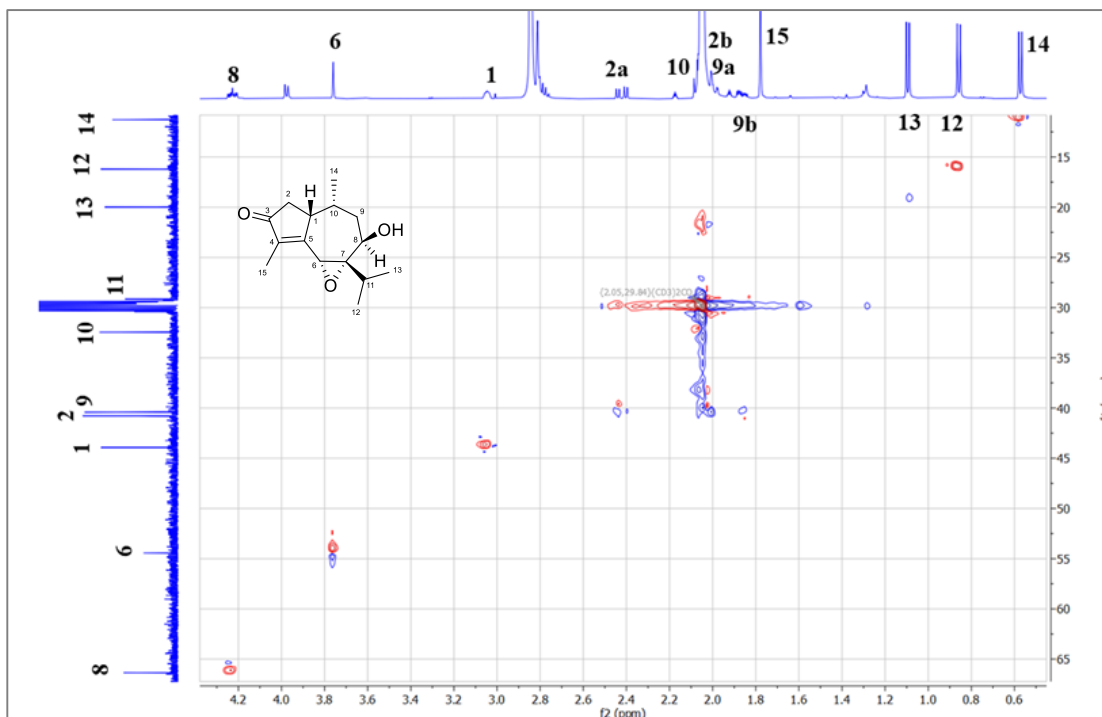

Figure S23. HSQC (acetone- $d_6$ , 500 MHz, 125 MHz) spectrum of **3**

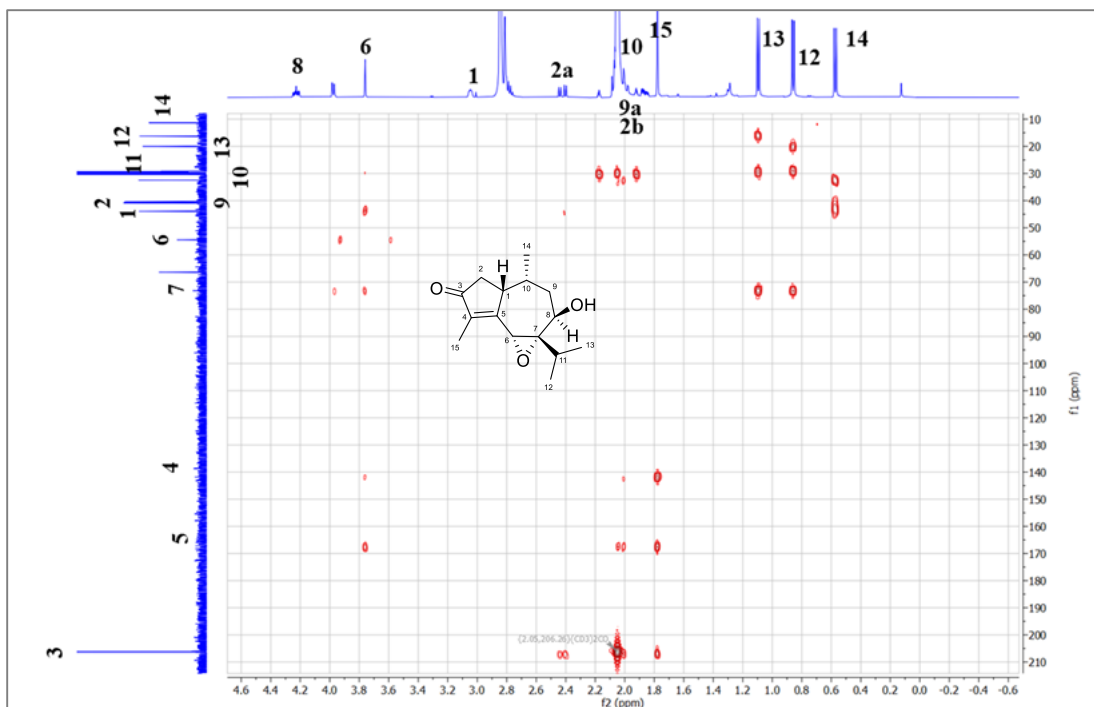

Figure S24. HMBC (acetone-*d*<sub>6</sub>, 500 MHz, 125 MHz) spectrum of **3**

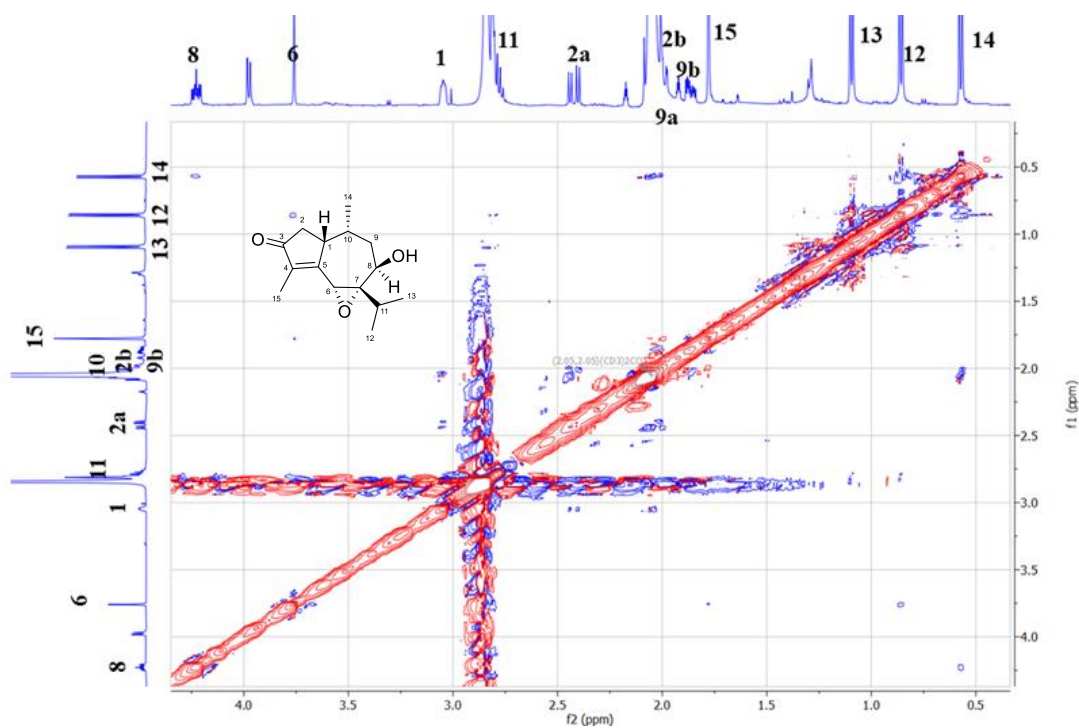

Figure S25. NOESY (acetone-*d*<sub>6</sub>, 500 MHz) spectrum of **3**

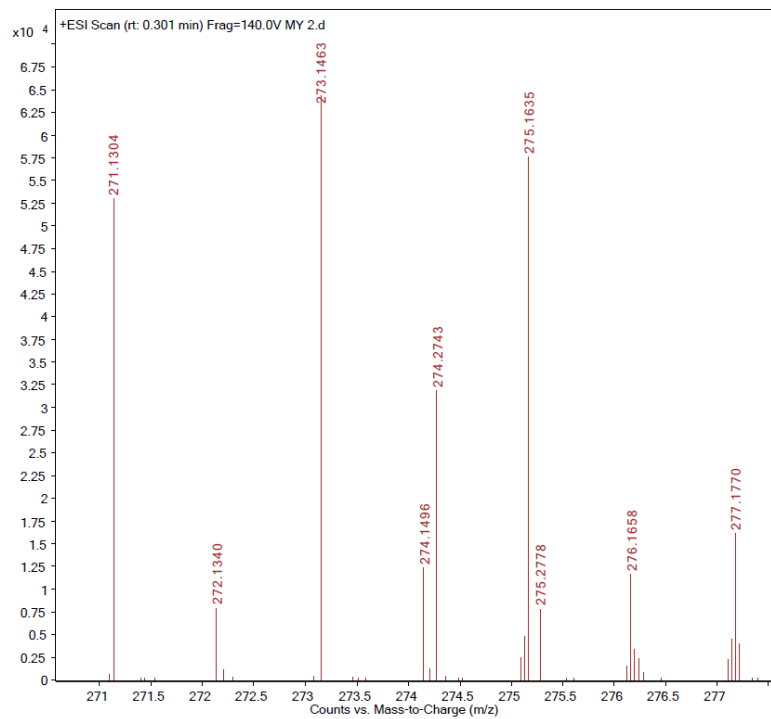

**Figure S26.** HRESIMS spectrum of **4**

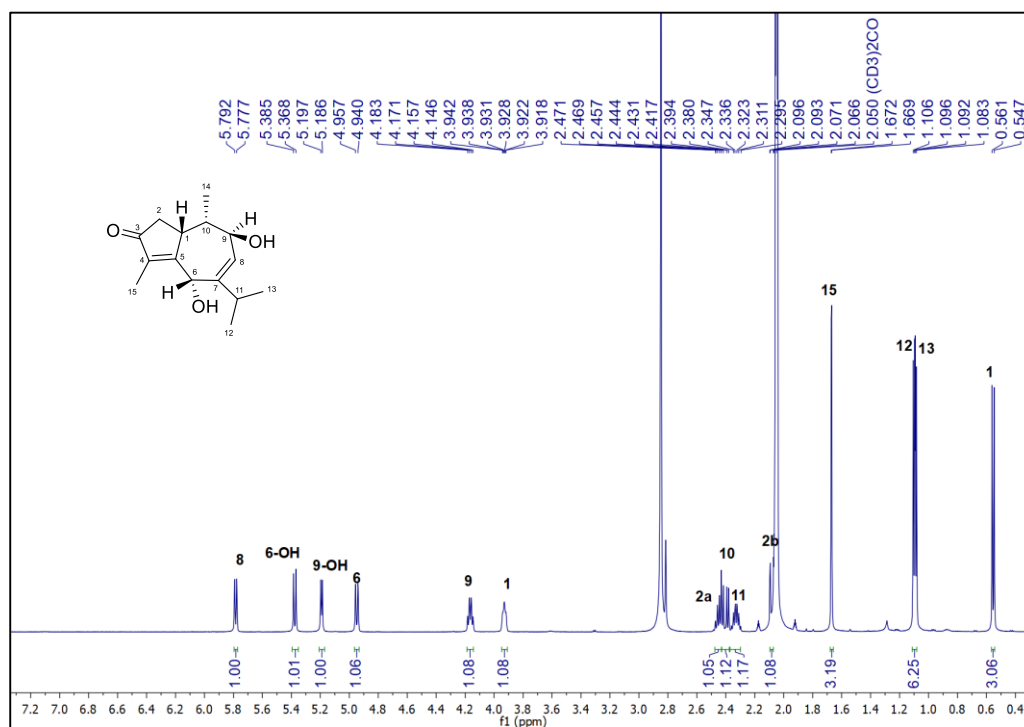

**Figure S27.** <sup>1</sup>H NMR (acetone-d<sub>6</sub>, 500 MHz) spectrum of **4**



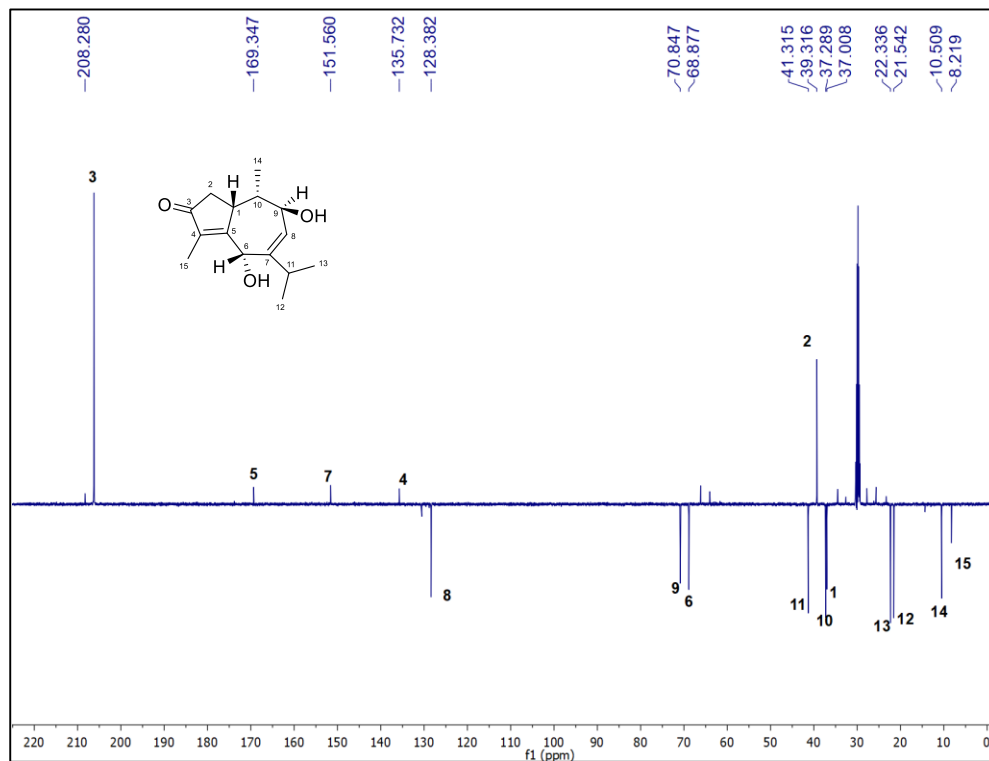

Figure S28.  $^{13}\text{C}$  NMR (acetone- $d_6$ , 125 MHz) spectrum of **4**

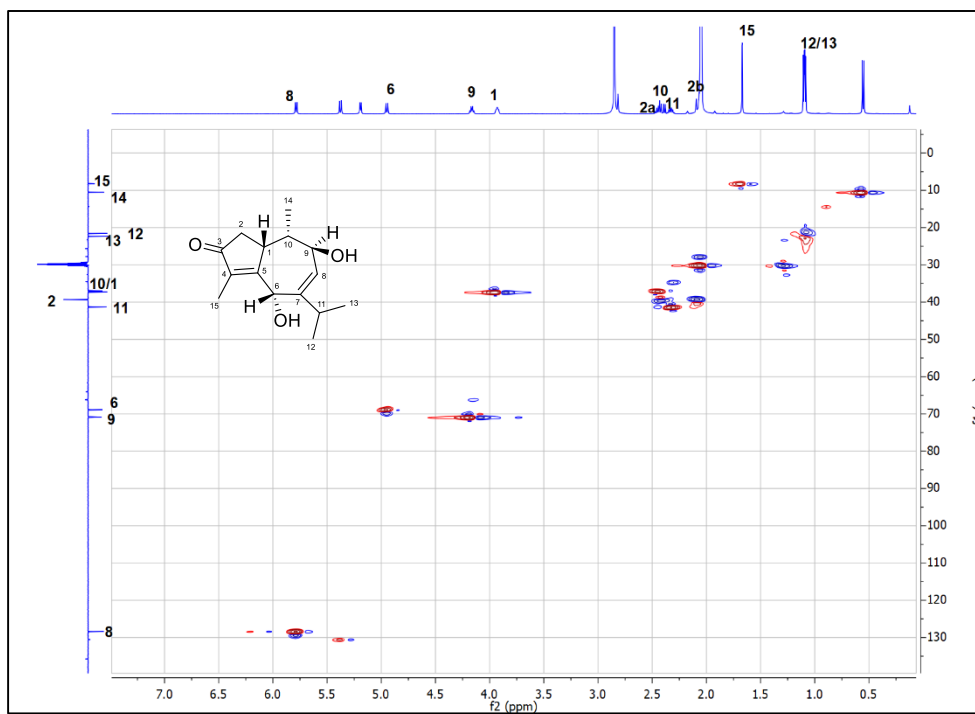

Figure S29. HSQC (acetone- $d_6$ , 500 MHz, 125 MHz) spectrum of **4**

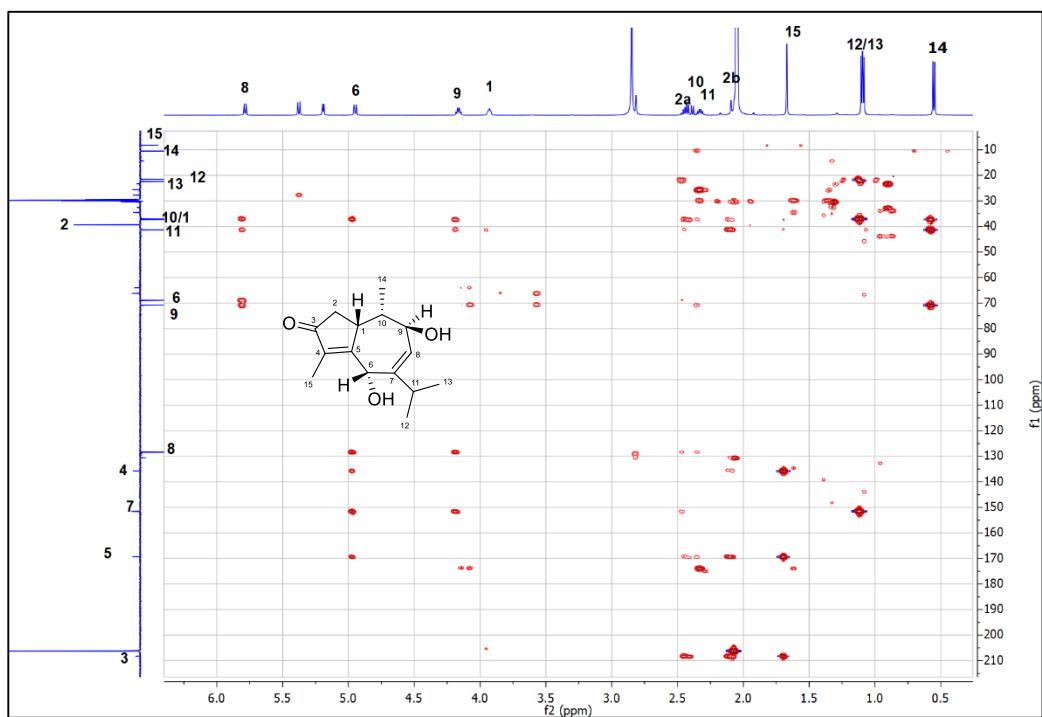

Figure S30. HMBC (acetone- $d_6$ , 500 MHz, 125 MHz) spectrum of **4**

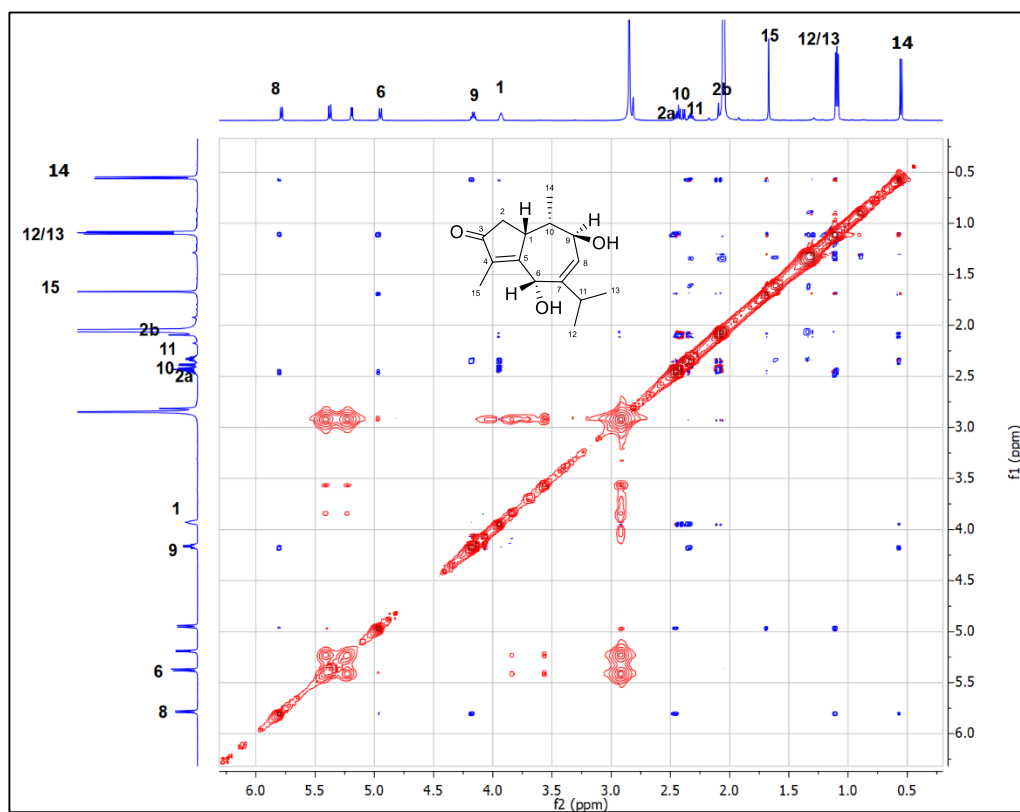

Figure S31. NOESY (acetone- $d_6$ , 500 MHz) spectrum of **4**

High-performance liquid chromatography analysis (HPLC) was conducted using an Agilent 1260 Infinity II system with a Diode Array Detector (DAD). For each prepared sample, 35  $\mu$ L (at a concentration of 1 mg/mL) was separately injected. A gradient system of acetonitrile (ACN) and water was used, with the following changes over a 60-minute analysis: 5% to 10% ACN in 5 minutes, 10% to 30% ACN in 15 minutes, 30% to 80% ACN in 10 minutes, 80% to 100% ACN in 5 minutes, followed by 100% ACN for 5 minutes. This analysis employed a Luna C18 column (Phenomenex, 150 mm  $\times$  4.6 mm, 5  $\mu$ m) and a C18 guard column (Phenomenex, Torrance, CA, USA)

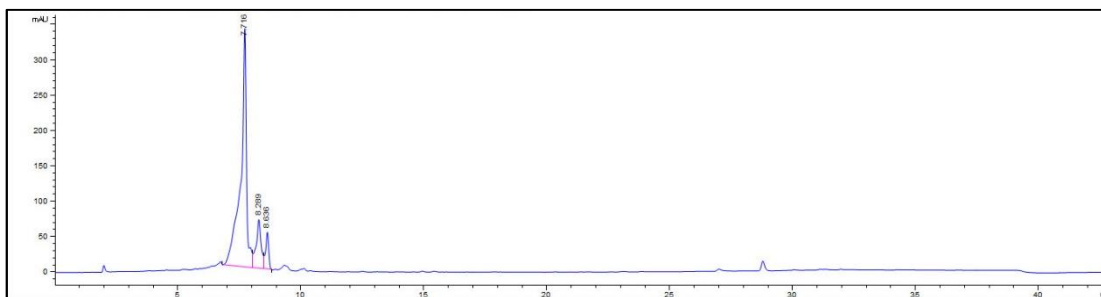

**Figure S32.** Chromatogram of **2**

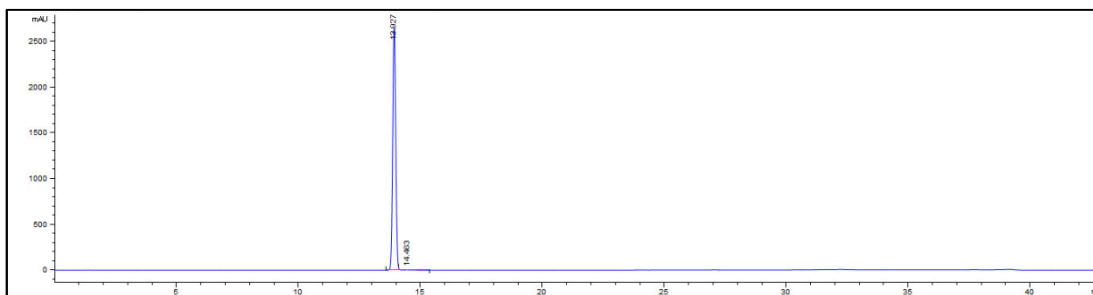

**Figure S33.** Chromatogram of **3**

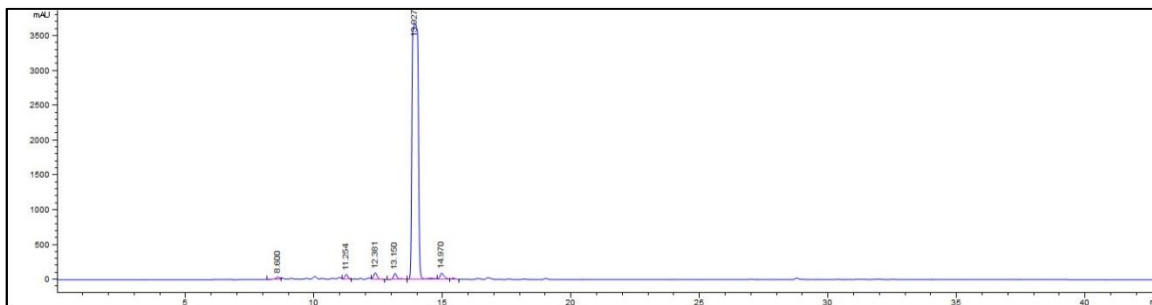

**Figure S34.** Chromatogram of **4**

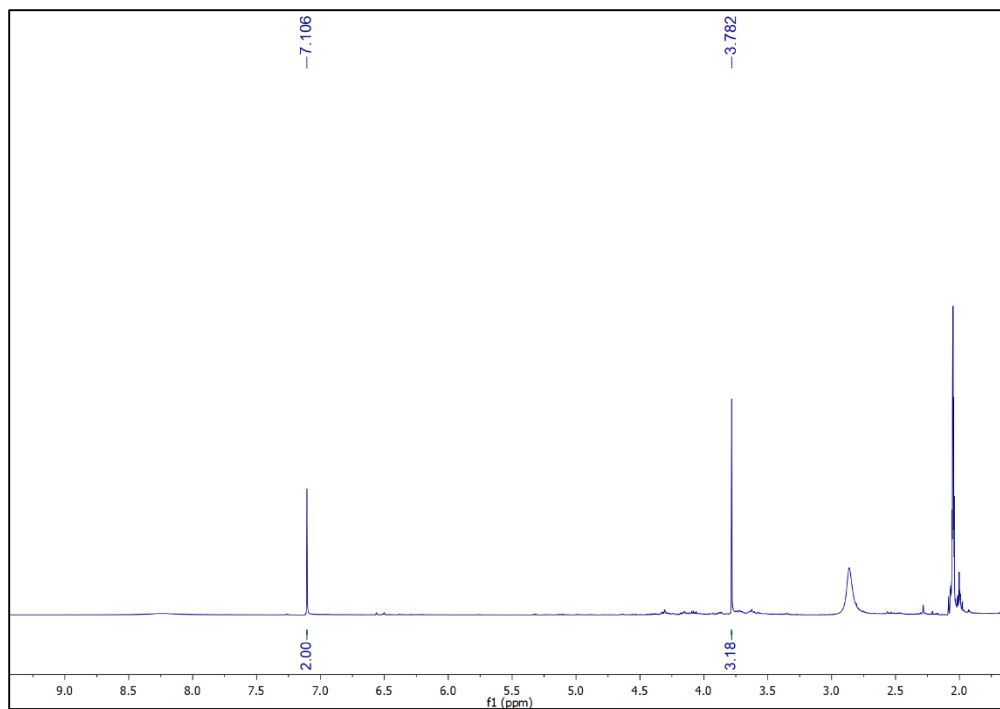

**Figure S35.**  $^1\text{H}$  NMR (acetone- $d_6$ , 500 MHz) spectrum of **5**

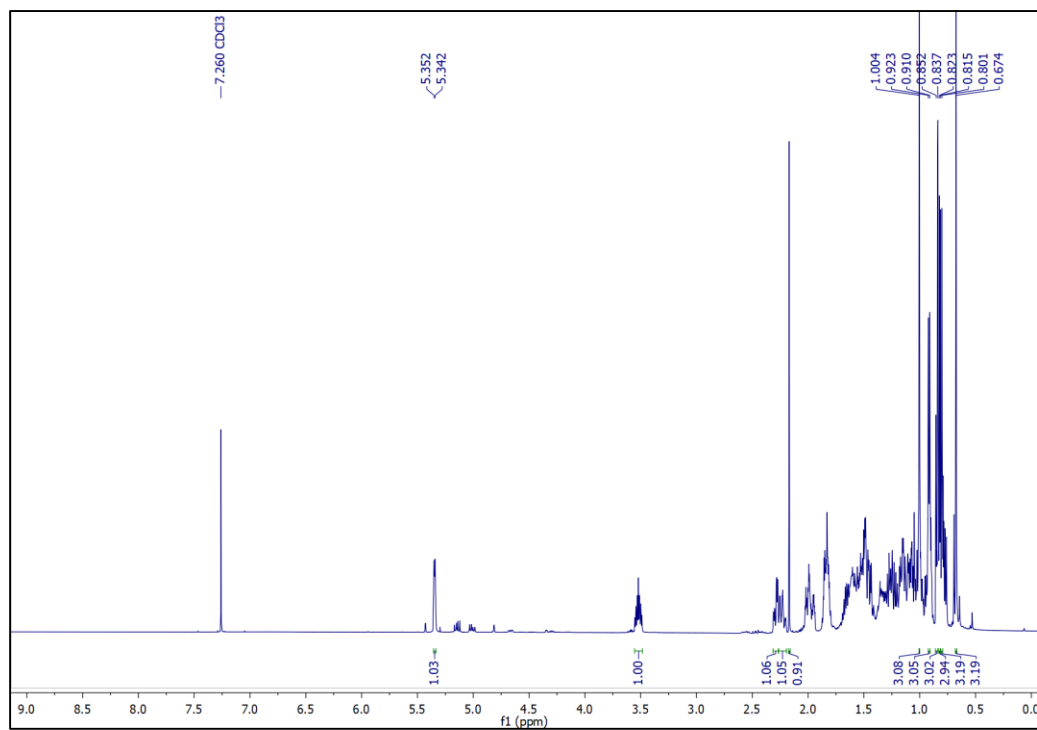

**Figure S36.**  $^1\text{H}$  NMR ( $\text{CDCl}_3$ , 500 MHz) spectrum of **6**

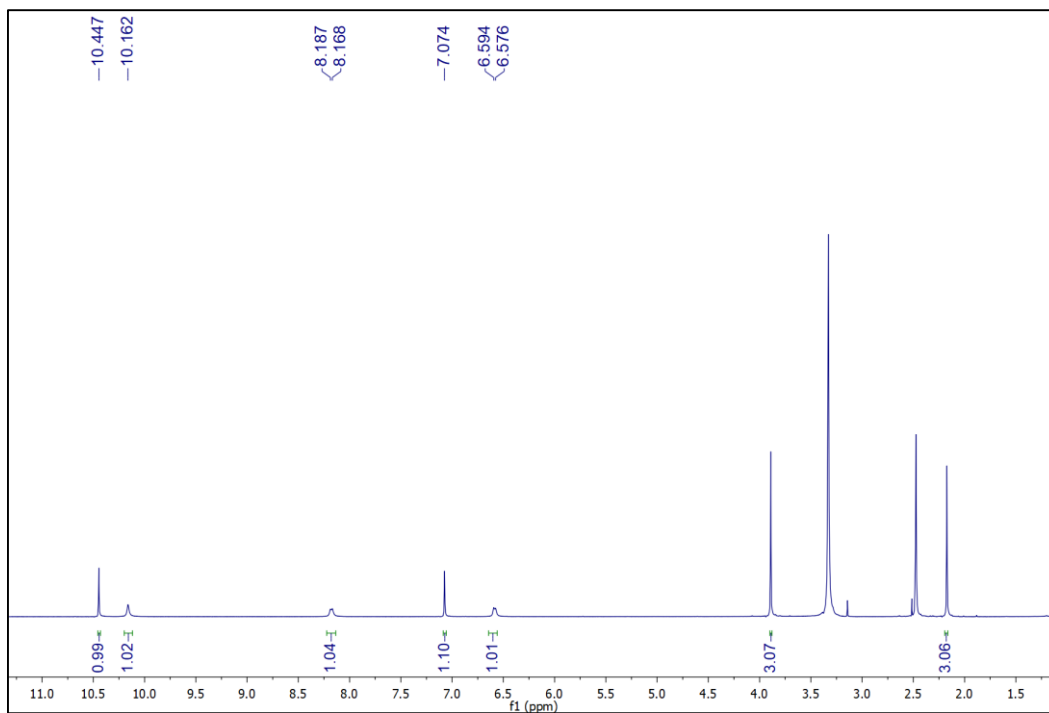

**Figure S37.**  $^1\text{H}$  NMR (DMSO- $d_6$ , 500 MHz) spectrum of **7**

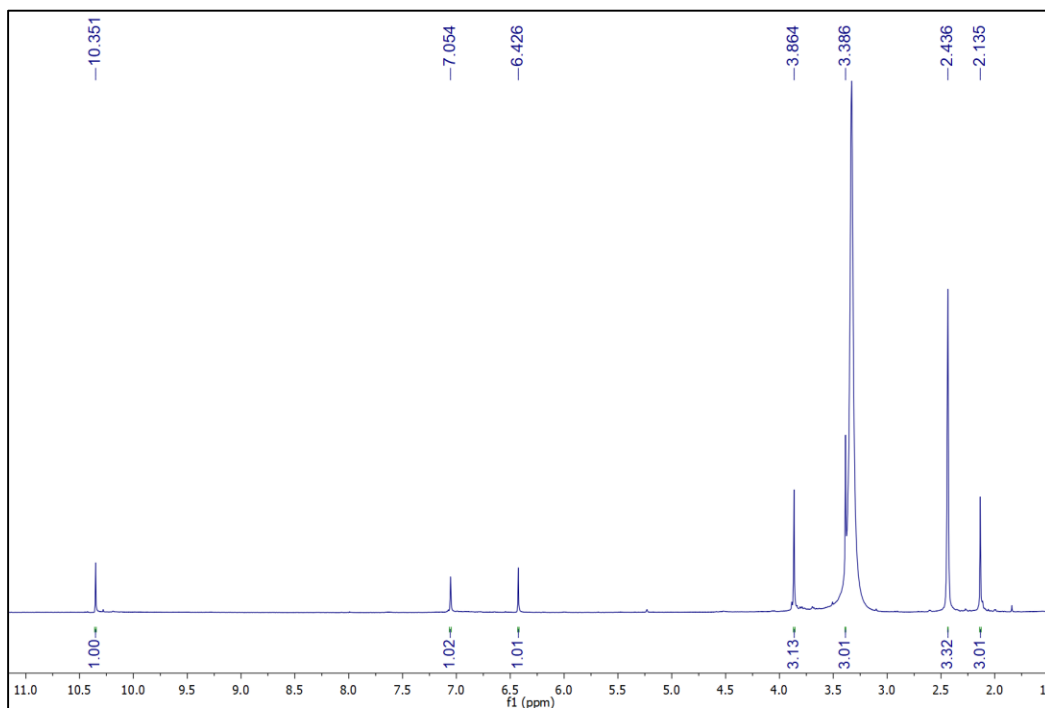

**Figure S38.**  $^1\text{H}$  NMR (DMSO- $d_6$ , 500 MHz) spectrum of **8**

## References

1. A. C. Smith and M. A. Hussey, "Gram Stain Protocols," ASM.org, Sep. 30, 2005. (accessed Aug. 10, 2022).
2. Maria P. MacWilliams, "Indole Test," ASM.org, 2009. (accessed Apr. 18, 2023).
3. Sylvia McDevitt, "Methyl Red and Voges-Proskauer Test Protocols," ASM.org, 2009. (accessed Apr. 18, 2023).
4. Catalase Test Protocol. (accessed Feb. 23, 2023).
5. Patricia Shields and Laura Cathcart, "Oxidase Test," ASM.org, 2010. (accessed Sep. 05, 2023).
6. Karen Reiner, "Carbohydrate fermentation protocol," ASM.org, 2012. (accessed Sep. 05, 2023).
7. D. Sue Katz, "Coagulase Test Protocol," Coagulase Test Protocol, 2010. (accessed Mar. 05, 2023).
